# Supplementary material for: One-step vulcanization of Cd(OH)Cl nanorods to synthesize CdS/ZnS/PdS nanotubes for highly efficient photocatalytic hydrogen evolution
Source: Royal Society of Chemistry journal article supplement (doi:10.1039/c9ta03862k), 2019-01-01
Supplement: c9ta03862k1.pdf [file c9ta03862k1.pdf]

## Supporting Information

### **One-step vulcanization of Cd(OH)Cl nanorods to synthesize CdS/ZnS/PdS nanotubes for highly efficient photocatalytic hydrogen evolution**

Guotai Sun,<sup>a</sup> Siman Mao,<sup>a</sup> Dandan Ma,<sup>a</sup> Yajun Zou,<sup>a</sup> Yixuan Lv,<sup>a</sup> Zhihui Li,<sup>a</sup> Chi He,<sup>b</sup> Yonghong  
Cheng,<sup>a</sup> Jian-Wen Shi,<sup>a,\*</sup>

*<sup>a</sup> State Key Laboratory of Electrical insulation and Power Equipment, Center of Nanomaterials for  
Renewable Energy, School of Electrical Engineering, Xi'an Jiaotong University, Xi'an 710049,  
China.*

*<sup>b</sup> Department of Environmental Science and Engineering, School of Energy and Power Engineering,  
Xi'an Jiaotong University, Xi'an 710049, China*

#### **Corresponding author:**

Jian-Wen Shi, E-mail: jianwen.shi@mail.xjtu.edu.cn

## 1. Materials

Sodium sulfite ( $\text{Na}_2\text{SO}_3$ ), sodium hydroxide ( $\text{NaOH}$ ) and sodium sulfate ( $\text{Na}_2\text{SO}_4$ ) were obtained from Sinopharm Chemical Reagent Co., Ltd. Polyvinyl pyrrolidone (PVP) and sodium tetrachloropalladate ( $\text{Na}_2\text{PdCl}_4$ ) was purchased from Shanghai Aladdin Bio-Chem Technology Co., Ltd. Sodium sulfide ( $\text{Na}_2\text{S} \cdot 9\text{H}_2\text{O}$ ) was obtained from Tianjin Tianli Chemical Reagent Co., Ltd. Cadmium chloride ( $\text{CdCl}_2 \cdot 2.5\text{H}_2\text{O}$ ) was purchased from Tianjin Kermel Chemical Reagent Co., Ltd. Thioacetamide (TAA) was obtained from Tianjin Guangfu fine chemical research institute. Gelatin and zinc chloride ( $\text{ZnCl}_2$ ) were purchased from Tianjin Shengao Chemical Reagent Co., Ltd. All of the reagents were analytically pure and used directly without further purification. Distilled water with a resistivity of  $18.2 \text{ M}\Omega \cdot \text{cm}$  was used throughout the experiments.

## 2. The chemical reaction processes

The detailed chemical reaction processes for one-step vulcanization of converting Cd(OH)Cl nanorods to CdS/ZnS/PdS nanotubes were proposed as follows:

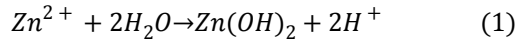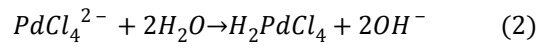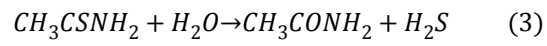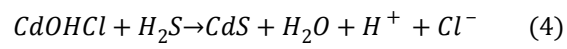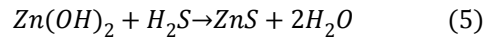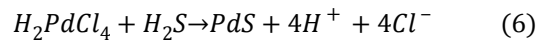

### 3. The calculation of apparent quantum efficiency

The apparent quantum efficiency (AQE) of the CZ<sub>3</sub>P<sub>1</sub>S sample was measured under the photocatalytic reaction condition (50 mg of catalysts in 100 mL solution of 0.35 M Na<sub>2</sub>S and 0.25 M Na<sub>2</sub>SO<sub>3</sub>) using 225 W Xenon lamp equipped with different band-pass filters of wavelengths. The AQE was calculated by the following equation:

$$\begin{aligned} AQE &= \frac{\text{number of reacted electrons}}{\text{number of incident photons}} \times 100\% \\ &= \frac{\text{number of evolved } H_2 \text{ molecules} \times 2}{\text{number of incident photons}} \times 100\% \\ &= \frac{n_{H_2} \times N_A \times 2}{E\lambda/hc} \times 100\% \end{aligned}$$

For instance, the above formula can be used to make the following calculation for the AQE at the wavelength of 365 nm with the required experimental parameters, including the power density of Xenon lamp at 365 nm (1.834 mW/cm<sup>2</sup>), the active area under irradiation light (28.3 cm<sup>2</sup>) and the molar of generated hydrogen in 2 h (148.76 μmol).

$$\begin{aligned} AQE &= \frac{148.76 \times 10^{-6} \times 6.02 \times 10^{23} \times 2}{1.834 \times 10^{-3} \times 28.3 \times 3600 \times 2 \times 365 \times 10^{-9} / (6.626 \times 10^{-34} \times 3 \times 10^8)} \times 100\% \\ &= 26.1\% \end{aligned}$$

#### 4. Figures

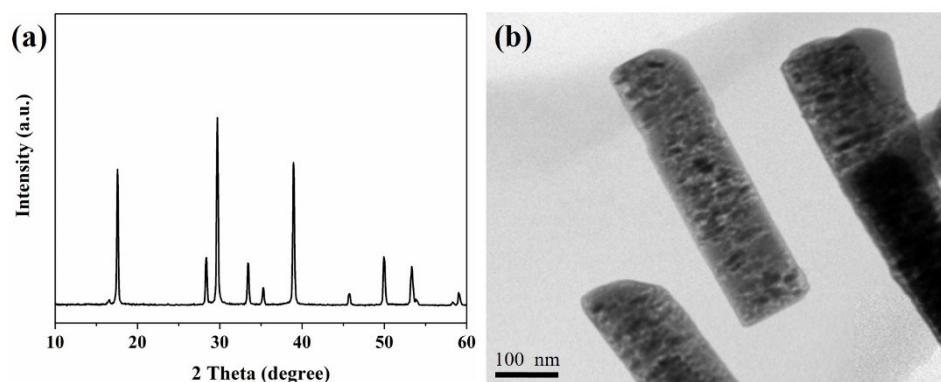

**Fig. S1.** The XRD pattern (a) and TEM image (b) of the as-prepared Cd(OH)Cl nanorods.

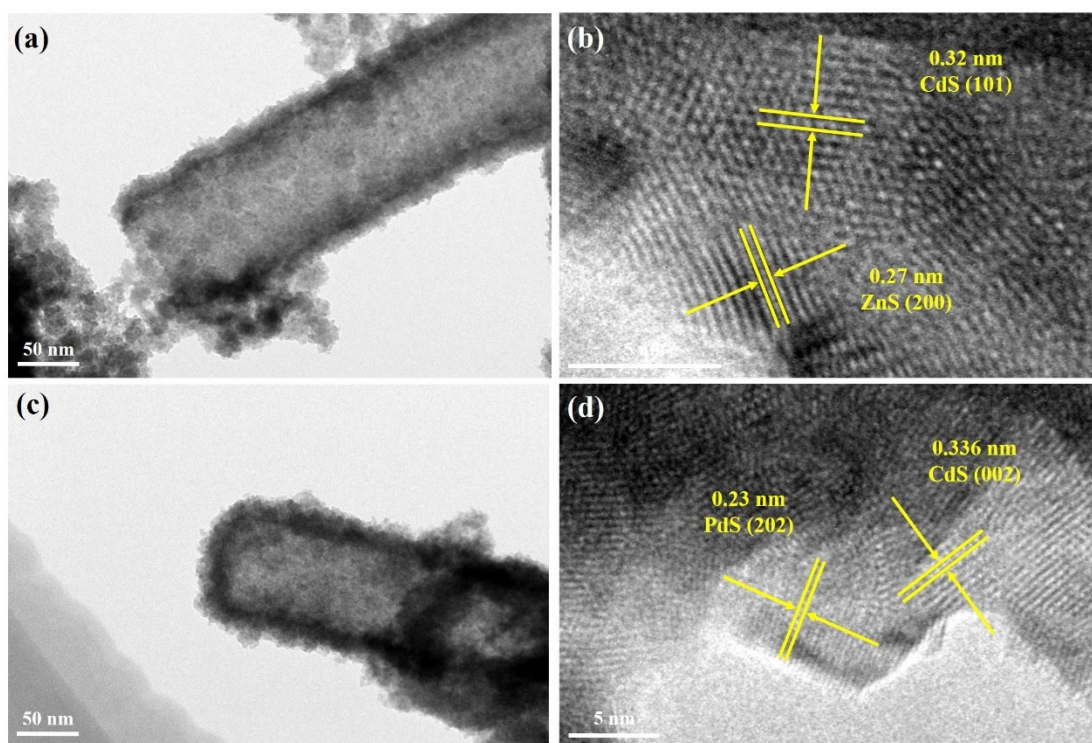

**Fig. S2.** TEM images of CZ<sub>3</sub>S (a, b) and CP<sub>1</sub>S (c, d).

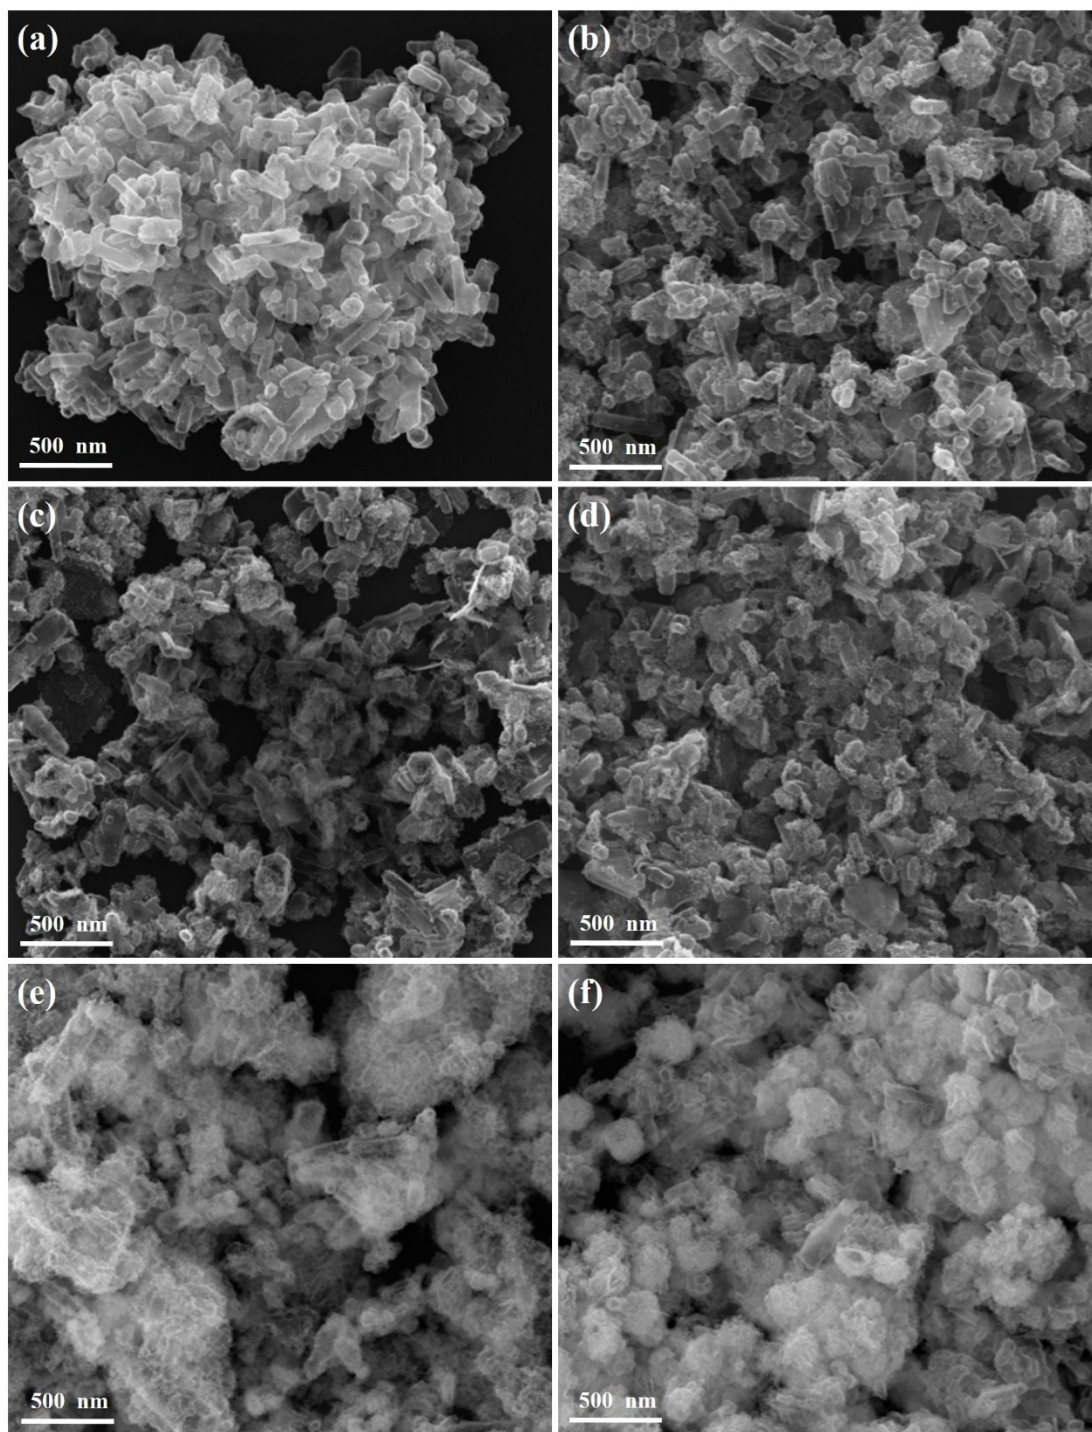

**Fig. S3.** SEM images of CdS (a), CZ<sub>1</sub>S (b), CZ<sub>3</sub>S (c), CZ<sub>5</sub>S (d), CP<sub>1</sub>S (e) and CZ<sub>3</sub>P<sub>1</sub>S (f).

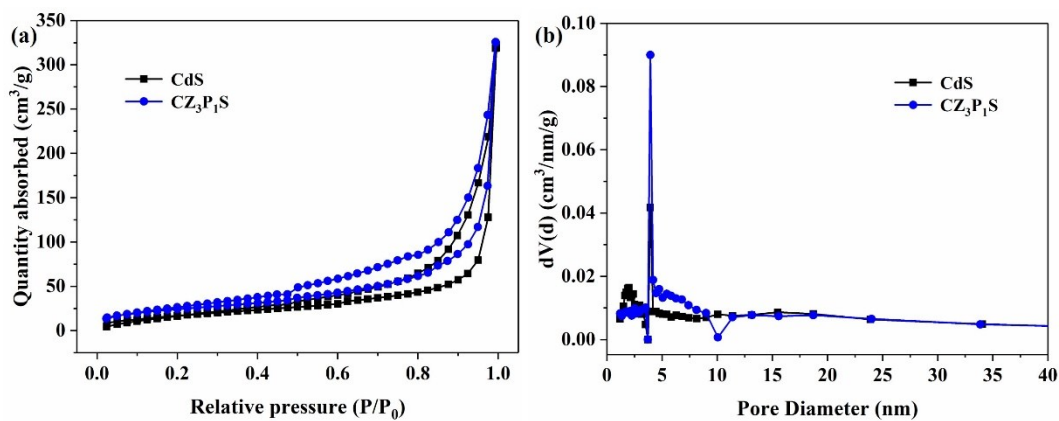

**Fig. S4.** N<sub>2</sub> adsorption-desorption isotherms (a) and pore size distribution curves (b) of CdS NTs and CZ<sub>3</sub>P<sub>1</sub>S catalyst.

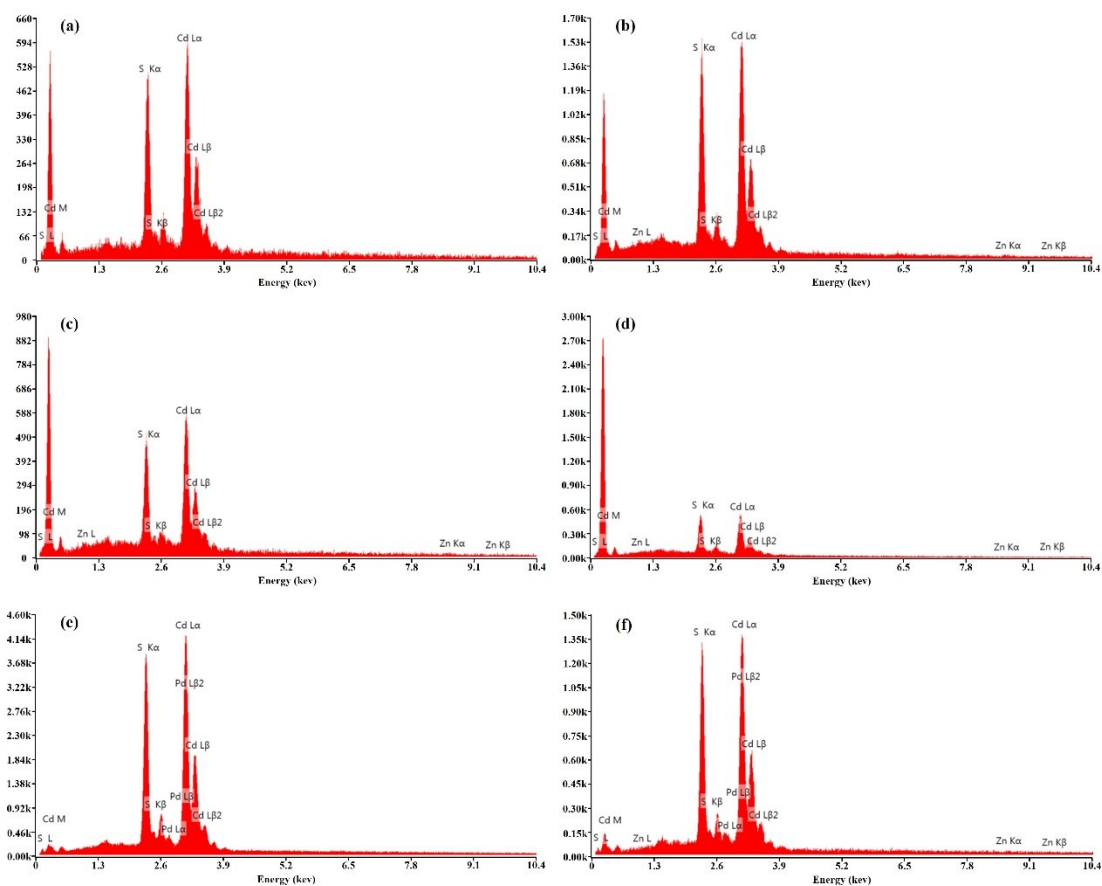

**Fig. S5.** EDX spectra of CdS (a), CZ<sub>1</sub>S (b), CZ<sub>3</sub>S (c), CZ<sub>5</sub>S (d), CP<sub>1</sub>S (e) and CZ<sub>3</sub>P<sub>1</sub>S (f).

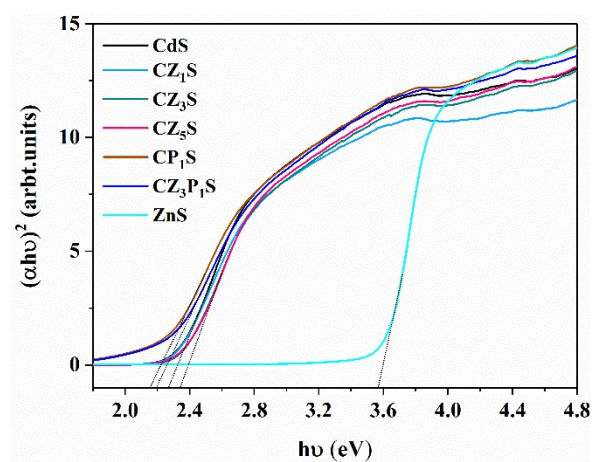

**Fig. S6.** Tauc plots of the as-prepared samples.

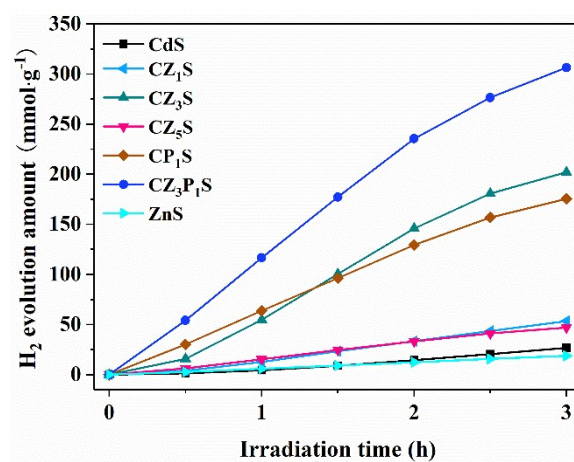

**Fig. S7.** Time courses of H<sub>2</sub> evolution over the as-synthesized samples.

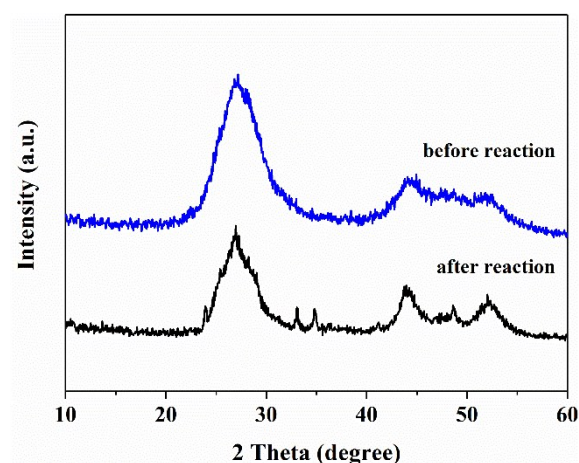

**Fig. S8.** XRD patterns of the CZ<sub>3</sub>P<sub>1</sub>S before and after cycling tests.

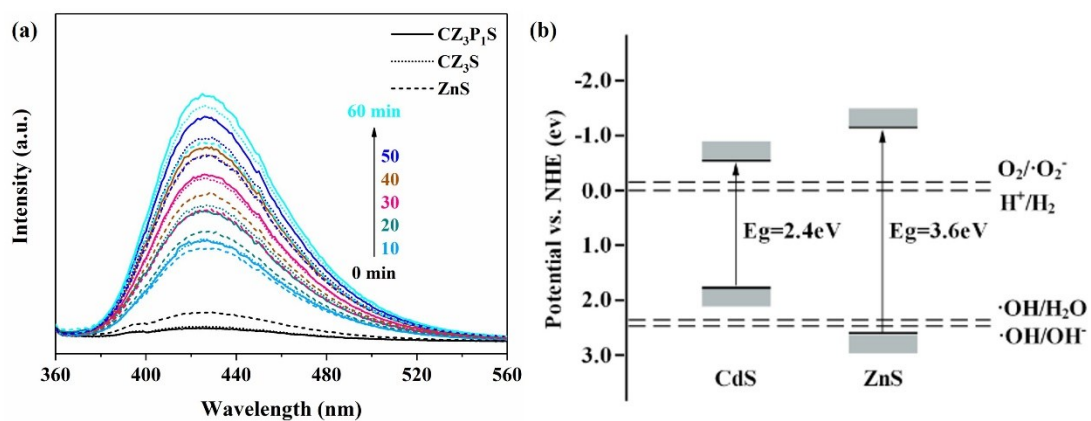

**Fig. S9.** PL spectra (a) of CZ<sub>3</sub>P<sub>1</sub>S, CZ<sub>3</sub>S and ZnS samples in a TA solution irradiated by simulated sunlight at different irradiation time (excitation at the wavelength of 315 nm), and the schematic diagram (b) of the band positions of CdS and ZnS.

## 5. Tables

**Table S1** The percentages of S, Cd, Zn and Pd in the as-prepared samples measured by the EDX.

| Sample       | CdS   | CZ <sub>1</sub> S | CZ <sub>3</sub> S | CZ <sub>5</sub> S | CP <sub>1</sub> S | CZ <sub>3</sub> P <sub>1</sub> S |
|--------------|-------|-------------------|-------------------|-------------------|-------------------|----------------------------------|
| S K (wt. %)  | 22.51 | 23.76             | 21.83             | 24.56             | 23.53             | 22.94                            |
| Cd L (wt. %) | 77.49 | 74.44             | 75.39             | 72.03             | 75.95             | 74.14                            |
| Zn K (wt. %) | -     | 1.8               | 2.78              | 3.41              | -                 | 1.44                             |
| Pd L (wt. %) | -     | -                 | -                 | -                 | 0.52              | 1.48                             |

**Table S2** The percentages of S, Cd, Zn and Pd in the CZ<sub>3</sub>P<sub>1</sub>S sample measured by XPS.

| Element            | S     | Cd    | Zn   | Pd   |
|--------------------|-------|-------|------|------|
| Percentage (at. %) | 48.88 | 46.85 | 2.98 | 1.29 |
| Percentage (wt. %) | 21.87 | 73.49 | 2.72 | 1.92 |

**Table S3** The band gap values of the as-prepared samples.

| Sample        | CdS  | CZ <sub>1</sub> S | CZ <sub>3</sub> S | CZ <sub>5</sub> S | CP <sub>1</sub> S | CZ <sub>3</sub> P <sub>1</sub> S | ZnS |
|---------------|------|-------------------|-------------------|-------------------|-------------------|----------------------------------|-----|
| Band gap (eV) | 2.32 | 2.35              | 2.39              | 2.42              | 2.22              | 2.26                             | 3.6 |

**Table S4** Comparison of the photocatalytic H<sub>2</sub> evolution rates over different CdS-based photocatalysts.

| Catalyst                                               | R(H <sub>2</sub> ) (mmol/g/h) | Sacrificial agents                                                  | Reference     |
|--------------------------------------------------------|-------------------------------|---------------------------------------------------------------------|---------------|
| CdS NTs                                                | 8.9                           | 0.35 M Na <sub>2</sub> S and 0.25 M Na <sub>2</sub> SO <sub>3</sub> | This work     |
| CZ <sub>3</sub> P <sub>1</sub> S                       | 102.1                         | 0.35 M Na <sub>2</sub> S and 0.25 M Na <sub>2</sub> SO <sub>3</sub> | This work     |
| CdS nanoplates/Pt                                      | 3.75                          | 0.25 M Na <sub>2</sub> S and 0.25 M Na <sub>2</sub> SO <sub>3</sub> | <sup>1</sup>  |
| Pt-PdS/CdS NPs                                         | 29.23                         | 0.5 M Na <sub>2</sub> S and 0.5 M Na <sub>2</sub> SO <sub>3</sub>   | <sup>2</sup>  |
| CdS NRs/NiS                                            | 1.131                         | 0.35 M Na <sub>2</sub> S and 0.25 M Na <sub>2</sub> SO <sub>3</sub> | <sup>3</sup>  |
| Au/CdS/TiO <sub>2</sub>                                | 1.97                          | 0.25 M Na <sub>2</sub> S and 0.25 M Na <sub>2</sub> SO <sub>3</sub> | <sup>4</sup>  |
| TiO <sub>2</sub> -Au-CdS                               | 1.81                          | 0.1 M Na <sub>2</sub> S and 0.1 M Na <sub>2</sub> SO <sub>3</sub>   | <sup>5</sup>  |
| Cd <sub>0.5</sub> Zn <sub>0.5</sub> S/MoO <sub>2</sub> | 25.24                         | 0.1 M Na <sub>2</sub> S and 0.1 M Na <sub>2</sub> SO <sub>3</sub>   | <sup>6</sup>  |
| ZnO/CdS/ZnS                                            | 44.7                          | 0.35 M Na <sub>2</sub> S and 0.25 M Na <sub>2</sub> SO <sub>3</sub> | <sup>7</sup>  |
| ZnO/CdS/ZnS                                            | 2.077                         | 0.35 M Na <sub>2</sub> S and 0.25 M Na <sub>2</sub> SO <sub>3</sub> | <sup>8</sup>  |
| Pd/CdS/PdS                                             | 89.2                          | 0.1 M Na <sub>2</sub> S and 0.1 M Na <sub>2</sub> SO <sub>3</sub>   | <sup>9</sup>  |
| CdS/ZnS                                                | 0.792                         | 0.35M Na <sub>2</sub> S and 0.25 M Na <sub>2</sub> SO <sub>3</sub>  | <sup>10</sup> |

## References

1. J. Feng, C. An, L. Dai, J. Liu, G. Wei, S. Bai, J. Zhang and Y. Xiong, *Chem. Eng. J.*, 2016, **283**, 351-357.
2. H. Yan, J. Yang, G. Ma, G. Wu, X. Zong, Z. Lei, J. Shi and C. Li, *J. Catal.*, 2009, **266**, 165-168.
3. J. Zhang, S. Z. Qiao, L. Qi and J. Yu, *Phys. Chem. Chem. Phys.*, 2013, **15**, 12088-12094.

4. J. Fang, L. Xu, Z. Zhang, Y. Yuan, S. Cao, Z. Wang, L. Yin, Y. Liao and C. Xue, *ACS Appl. Mat. Interfaces*, 2013, **5**, 8088-8092.
5. H. Zhao, M. Wu, J. Liu, Z. Deng, Y. Li and B.-L. Su, *Appl. Catal., B*, 2016, **184**, 182-190.
6. H. Du, X. Xie, Q. Zhu, L. Lin, Y.-F. Jiang, Z.-K. Yang, X. Zhou and A.-W. Xu, *Nanoscale*, 2015, **7**, 5752-5759.
7. J.-W. Shi, D. Ma, Y. Zou, Z. Fan, J. Shi, L. Cheng, X. Ji and C. Niu, *J. Power Sources*, 2018, **379**, 249-260.
8. H. Zhao, Y. Dong, P. Jiang, G. Wang, H. Miao, R. Wu, L. Kong, J. Zhang and C. Zhang, *ACS Sustainable Chem. Eng.*, 2015, **3**, 969-977.
9. Q. Sun, N. Wang, J. Yu and J. C. Yu, *Adv. Mater.*, 2018, **30**, 1804368.
10. Y. P. Xie, Z. B. Yu, G. Liu, X. L. Ma and H.-M. Cheng, *Energy Environ. Sci.*, 2014, **7**, 1895-1901.

**Table S5** AQE over the CZ<sub>3</sub>P<sub>1</sub>S sample at different wavelengths.

| $\lambda$ (nm) | 365  | 380   | 420 | 500  |
|----------------|------|-------|-----|------|
| AQE (%)        | 26.1 | 20.51 | 6.9 | 1.63 |
